# Supplementary material
Source: PubMed Central journal article supplement (PMC2652498)
Supplement: 00024.2008_1.pdf [file 00024.2008_1.pdf]

Supplementary Table 1. *Primer and probes sequences used for real-time RT-PCR*

|                             | 5'-Oligonucleotide (5'-3')   | Probe (MGB), 5'-3'    | 3'-Oligonucleotide (5'-3')    |
|-----------------------------|------------------------------|-----------------------|-------------------------------|
| RAGE                        | GCTGTAGCTGGTGGTCAGAACA       | CACAGCCCGGATTG        | CCCCTTACAGCTTAGCACAAGTG       |
| AGE-R1                      | CCCGTCGGTGGAAGATTTT          | ATCAACGTGGAGACCAT     | GCTGCCGCCACCATCA              |
| AGE-R3                      | CAGACAGCTTTTCGCTTAACGA       | CTGGCTCTGGAAACC       | CCATGCACCCGGATATCC            |
| MCP-1                       | GTCTGTGCTGACCCCAAGAAG        | AATGGGTCCAGACATAC     | TGGTTCCGATCCAGGTTTTTA         |
| TNF- $\alpha$               | GGCTGCCCCGACTACGT            | TCACCCACACCGTCAG      | TTTCTCCTGGTATGAGATAGCAAATC    |
| IL-6                        | GGGAAATCGTGAAATGAGAAA        | ATTGCCATTGCACAACCT    | AAGTGCATCATCGTTGTTTCATACA     |
| gp91 <sup>phox</sup>        | AGTGCGTGTTGCTCGACAAG         | CAACTGGACAGGAACCT     | CCAAGCTACCATCTTATGGAAAGTG     |
| HO                          | AGATGACACCTGAGGTCAAGCA       | CTAAGACCGCCTTCCT      | TTGTGTTCTCTGTCAGCATCAC        |
| ICAM-1                      | GGAGGTGGCGGGAAAGTT           | CCCTGGAACCTGCACG      | TCCAGCCGAGGACCATACAG          |
| NF $\kappa$ B p65           | TCTCACATCCGATTTTTGATAACC     | AGCTCAAGATCTGCCG      | CGAGGCAGCTCCCAGAGTT           |
| p47 <sup>phox</sup> (NOX-2) | CCGGCTATTTCCCATCCAT          | CCCAGCCTTCTGCAGAT     | TCGCTGGGCCTGGGTTAT            |
| NOX-4                       | AAAAATATCACACACTGAATTCGAGACT | CATTTTGCTATTTTCATCAAA | TGGGTCCACAGCAGAAAACCTC        |
| RAC-1                       | CGAAAGAGATCGGTGCTGTCA        | ACAGCGAGGACTCAA       | AGAGAACCGCTCGGATAGCTT         |
| GPX-1                       | CCCCACTGCGCTCATGA            | CGACCCCAAGTACATC      | GGCACACCGGAGACCAAAA           |
| GPX-3                       | GCCAGCTACTGAGGTCTGACAGA      | TACCTTGAAGTGAATGCACT  | CAAATGGCCCAAGTTCTTCTTG        |
| CD36                        | AAGCCAGCTAGAAAAATAGAAGCATT   | AGAATCTGAAGAGACCTTAC  | AGTCTCATTTAGCCACAGTATAGGTACAA |

|               |                                |                   |                         |
|---------------|--------------------------------|-------------------|-------------------------|
| PPAR $\alpha$ | GATTCAGAAGAAGAACCGGAACA        | TGCCAGTACTGCCGTTT | CCGACAGACAGGCACTTGTG    |
| $\beta$ -MHC  | GGAATGTTAGAGATATTTTTGCTTCACTTT | CCTGGAACTCAGACCC  | AAACAATTGGAAGTGGTCGTCAT |
| Collagen I    | GACTGGAAGAGCGGAGAGTACTG        | ATCGACCCTAACCAAG  | CCTTGATGGCGTCCAGGTT     |
| Collagen IV   | GGCGGTACACAGTCAGACCAT          | CAGTGCCCTAACGGT   | GGAATAGCCGATCCACAGTGA   |

Abbreviations for genes are detailed in the text.
